# Supplementary material for: Incidence and factors associated with cutaneous immune-related adverse events to immune check point inhibitors: An ambispective cohort study
Source: PubMed Central journal article supplement (PMC9630333; doi:10.3389/fimmu.2022.965550), 2022-10-20

## Supplementary Information

### **Incidence and Factors Associated with Cutaneous Immune-Related Adverse Events to Immune Check Point Inhibitors: An Ambispective Cohort Study**

Athitaya Luangnara, Salin Kiratikanon, Thanika Ketpueak, Thatthan Suksombooncharoen, Chaiyut Charoentum, Busyamas Chewaskulyong, Napatra Tovanabutra, Siri Chiewchanvit, Surapon Nochaiwong\*, Mati Chuamanochan\*

**\*Correspondence:**

Mati Chuamanochan, MD, Division of Dermatology, Department of Internal Medicine, Faculty of Medicine, Chiang Mai University, Chiang Mai 50200, Thailand, Phone: +66-53936735-6, Fax: +66-53946234, Email: mati.c@cmu.ac.th

**or**

Surapon Nochaiwong, PharmD, Department of Pharmaceutical Care, Faculty of Pharmacy, Chiang Mai University, Chiang Mai 50200, Thailand, Phone: +66-899973365, Fax: 6653222741, Email: surapon.nochaiwong@gmail.com

**Table S1** Univariable risk factors of cirAE in patients treated with ICI

| Factors                                         | Crude RR (95% CI)  | P value |
|-------------------------------------------------|--------------------|---------|
| Age, year                                       |                    |         |
| <65                                             | 1.00 (Reference)   |         |
| 65-75                                           | 1.46 (0.78 – 2.72) | 0.231   |
| >75                                             | 2.04 (1.04 – 2.98) | 0.038   |
| Sex                                             |                    |         |
| Male                                            | 1.00 (Reference)   |         |
| Female                                          | 0.95 (0.54 – 1.65) | 0.849   |
| Cancer type                                     |                    |         |
| Lung                                            | 1.00 (Reference)   |         |
| Liver                                           | 1.52 (0.79 – 2.91) | 0.209   |
| Melanoma                                        | 1.35 (0.56 – 3.26) | 0.509   |
| Other <sup>†</sup>                              | 1.39 (0.65 – 2.96) | 0.393   |
| Cancer stage <sup>‡</sup>                       |                    |         |
| II/III                                          | 1.00 (Reference)   |         |
| IV                                              | 0.88 (0.49 – 1.57) | 0.667   |
| ECOG performance scale <sup>‡</sup>             |                    |         |
| 0                                               | 1.00 (Reference)   |         |
| 1                                               | 1.61 (0.65 – 3.97) | 0.304   |
| 2                                               | 0.33 (0.04 – 2.61) | 0.292   |
| Pre-ICI treatments <sup>‡</sup>                 |                    |         |
| Traditional chemotherapy                        | 1.00 (Reference)   |         |
| Radiotherapy                                    | 0.75 (0.12 – 4.58) | 0.752   |
| Targeted agent                                  | 1.46 (0.75 – 2.86) | 0.269   |
| Concurrent chemoradiation therapy               | 1.49 (0.47 – 4.78) | 0.499   |
| Traditional chemotherapy plus radiotherapy      | 0.62 (0.10 – 3.95) | 0.615   |
| None                                            | 1.87 (0.97 – 3.60) | 0.063   |
| ICI precipitating first cirAE                   |                    |         |
| Anti-PD-1                                       | 1.00 (Reference)   |         |
| Anti-PD-L1                                      | 0.89 (0.50 – 1.58) | 0.682   |
| Anti-CTLA-4 or anti-CTLA-4 plus anti-PD-1/PD-L1 | 1.20 (0.39 – 3.73) | 0.753   |
| Hypertension                                    |                    |         |
| No                                              | 1.00 (Reference)   |         |
| Yes                                             | 1.50 (0.88 – 2.55) | 0.137   |
| Diabetes mellitus                               |                    |         |
| No                                              | 1.00 (Reference)   |         |
| Yes                                             | 1.74 (0.99 – 3.06) | 0.054   |
| Coronary artery disease                         |                    |         |
| No                                              | 1.00 (Reference)   |         |
| Yes                                             | 2.14 (0.91 – 5.01) | 0.080   |

<sup>†</sup>Other cancer types included head and neck, genitourinary (renal, urothelial), bladder cancer, colorectal carcinoma, cervical cancer, and gastric cancer.

<sup>‡</sup>Missing data for one patient.

Abbreviations: CI, confidence interval; cirAEs, cutaneous immune-related adverse events; ICI, immune checkpoint inhibitor; RR, risk ratio.

**Table S1** Univariable risk factors of cirAE in patients treated with ICI (continued)

| Factors                                         | Crude RR (95% CI)  | P value |
|-------------------------------------------------|--------------------|---------|
| Chronic kidney disease: stage 3-4               |                    |         |
| No                                              | 1.00 (Reference)   |         |
| Yes                                             | 3.38 (2.52 – 4.52) | <0.001  |
| Chronic pulmonary disease                       |                    |         |
| No                                              | 1.00 (Reference)   |         |
| Yes                                             | 0.43 (0.07 – 2.71) | 0.368   |
| Cirrhosis                                       |                    |         |
| No                                              | 1.00 (Reference)   |         |
| Yes                                             | 0.95 (0.40 – 2.27) | 0.911   |
| Charlson comorbidity index                      |                    |         |
| ≤8                                              | 1.00 (Reference)   |         |
| >8                                              | 1.33 (0.78 – 2.28) | 0.295   |
| Multimorbidity (excluded cancer)                |                    |         |
| No                                              | 1.00 (Reference)   |         |
| Yes                                             | 1.49 (0.84 – 2.63) | 0.171   |
| History of drug allergy                         |                    |         |
| No                                              | 1.00 (Reference)   |         |
| Yes                                             | 0.87 (0.41 – 1.82) | 0.705   |
| Hemoglobin, g/dL                                |                    |         |
| ≥12 in females or ≥13 in males                  | 1.00 (Reference)   |         |
| <12 in females or <13 in males                  | 0.99 (0.56 – 1.75) | 0.963   |
| White blood cells count x 10 <sup>3</sup> , μ/L |                    |         |
| ≤8.5                                            | 1.00 (Reference)   |         |
| >8.5                                            | 0.90 (0.49 – 1.65) | 0.727   |
| Platelet count x 10 <sup>3</sup> , μ/L          |                    |         |
| ≤250                                            | 1.00 (Reference)   |         |
| >250                                            | 0.77 (0.45 – 1.32) | 0.350   |
| Neutrophil-to-lymphocyte ratio                  |                    |         |
| ≤3                                              | 1.00 (Reference)   |         |
| >3 – 6                                          | 0.80 (0.45 – 1.43) | 0.450   |
| >6                                              | 0.18 (0.03 – 1.24) | 0.082   |
| Platelet-to-lymphocyte ratio                    |                    |         |
| ≤150                                            | 1.00 (Reference)   |         |
| >150 – 250                                      | 0.78 (0.41 – 1.47) | 0.440   |
| >250                                            | 0.92 (0.46 – 1.83) | 0.815   |
| Serum albumin, g/dL                             |                    |         |
| ≥4.5                                            | 1.00 (Reference)   |         |
| 3.5 – < 4.5                                     | 0.89 (0.41 – 1.92) | 0.771   |
| <3.5                                            | 0.69 (0.28 – 1.73) | 0.431   |
| Total protein, g/dL                             |                    |         |
| <8                                              | 1.00 (Reference)   |         |
| ≥8                                              | 1.51 (0.88 – 2.58) | 0.135   |

Abbreviations: CI, confidence interval; cirAEs, cutaneous immune-related adverse events; ICI, immune checkpoint inhibitor; RR, risk ratio.

**Table S1** Univariable risk factors of cirAE in patients treated with ICI (continued)

| <b>Factors</b>                  | <b>Crude RR (95% CI)</b> | <b>P value</b> |
|---------------------------------|--------------------------|----------------|
| Globulin, g/dL                  |                          |                |
| ≤3.5                            | 1.00 (Reference)         |                |
| >3.5                            | 1.17 (0.67 – 2.02)       | 0.582          |
| Albumin-to-globulin ratio       |                          |                |
| ≥1.26                           | 1.00 (Reference)         |                |
| <1.26                           | 1.41 (0.70 – 2.87)       | 0.337          |
| Aspartate aminotransferase, U/L |                          |                |
| ≤30                             | 1.00 (Reference)         |                |
| >30                             | 1.51 (0.88 – 2.58)       | 0.135          |
| Alanine transaminase, U/L       |                          |                |
| ≤30                             | 1.00 (Reference)         |                |
| >30                             | 1.38 (0.80 – 2.37)       | 0.248          |
| Alkaline phosphatase, U/L       |                          |                |
| <120                            | 1.00 (Reference)         |                |
| ≥120                            | 0.98 (0.54 – 1.79)       | 0.948          |
| Data collection                 |                          |                |
| Prospective cohort              | 1.00 (Reference)         |                |
| Retrospective cohort            | 0.54 (0.31 – 0.93)       | 0.026          |

Abbreviations: CI, confidence interval; cirAEs, cutaneous immune-related adverse events; ICI, immune checkpoint inhibitor; RR, risk ratio.

**Figure S1** Study Flow on the Selection of Eligible Patients

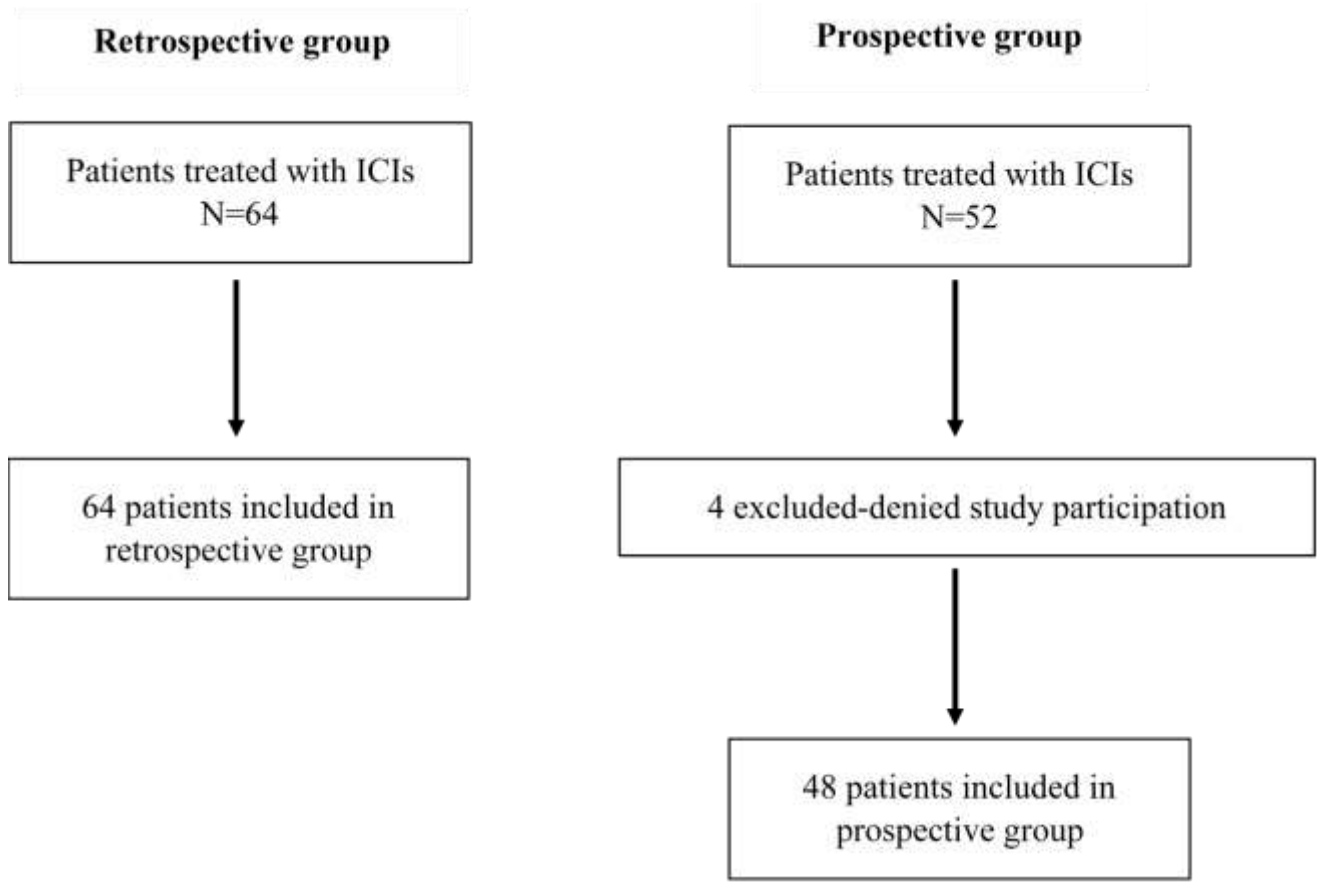

Supplement: DataSheet_1.pdf [file DataSheet_1.pdf]
